# Supplementary material for: Achieving highly efficient and selective cesium extraction using 1,3-di-octyloxycalix[4]arene-crown-6 in n-octanol based solvent system: experimental and DFT investigation
Source: Royal Society of Chemistry journal article supplement (doi:10.1039/d1ra02661e), 2021-01-01
Supplement: d1ra02661e1.pdf [file d1ra02661e1.pdf]

## Supporting information

*Achieving Highly Efficient and Selective Cesium Extraction using 1,3 di-octyloxy-calix [4]arene-crown-6 in n-octanol based Solvent System:  
Experimental And DFT Investigation*

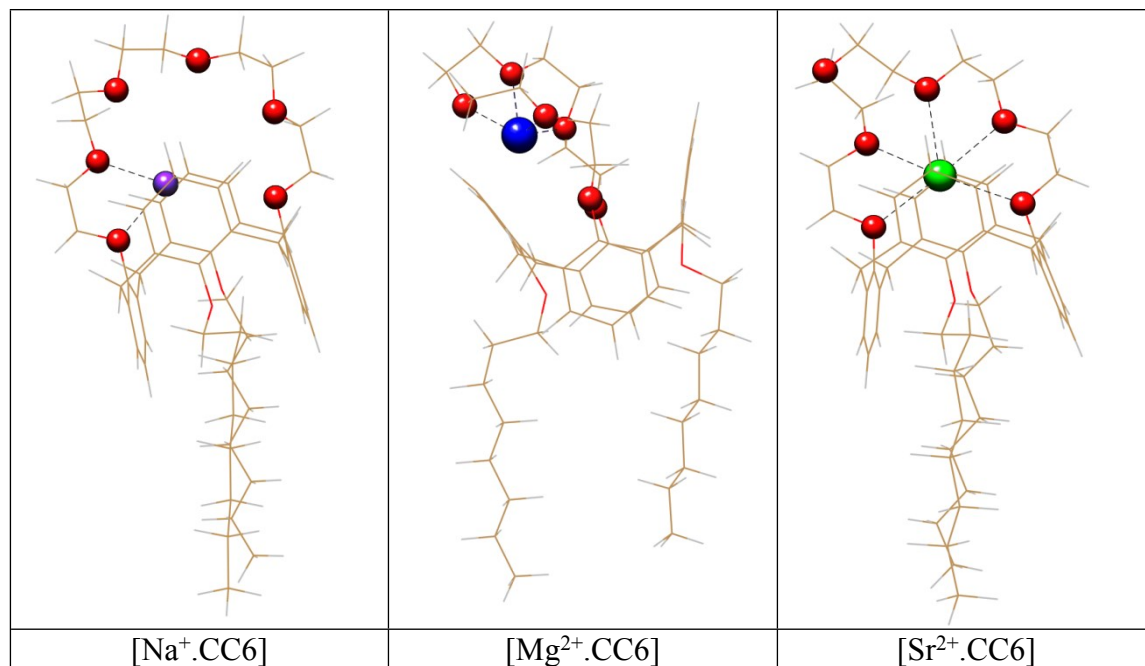

**Fig.S1:** Optimized structures of M.CC6 complexes. (M= Na<sup>+</sup>, Mg<sup>2+</sup> and Sr<sup>2+</sup>)

**Table S1:** Mulliken charges, HOMO-LUMO gap of M.CC6 complexes. (M= Na<sup>+</sup>, Mg<sup>2+</sup>, Sr<sup>2+</sup> and Cs<sup>+</sup>)

| Complex               | Charge | HOMO-LUMO ( $\Delta E$ , eV) |
|-----------------------|--------|------------------------------|
|                       | M      |                              |
| Na <sup>+</sup> .CC6  | 0.653  | -5.46                        |
| Mg <sup>2+</sup> .CC6 | 1.468  | -4.81                        |
| Sr <sup>2+</sup> .CC6 | 1.329  | -5.29                        |
| Cs <sup>+</sup> .CC6  | 0.946  | -5.54                        |

**Table S2:** Reorganization energies of CC6 ligand upon complexation with M. (M= Na<sup>+</sup>, Mg<sup>2+</sup>, Sr<sup>2+</sup> and Cs<sup>+</sup>)

| M. CC6                | Reorganization energy |
|-----------------------|-----------------------|
| Na <sup>+</sup> .CC6  | +6.00                 |
| Mg <sup>2+</sup> .CC6 | +34.41                |
| Sr <sup>2+</sup> .CC6 | +22.27                |
| Cs <sup>+</sup> .CC6  | +3.49                 |
